# Supplementary material for: Optimisation of cutaneous microbiota sampling methodology
Source: Front Microbiomes. 2025 Apr 22;4:1559981. doi: 10.3389/frmbi.2025.1559981 (PMC12993629; doi:10.3389/frmbi.2025.1559981)
Supplement: Supplementary file 8 [file Table1.xlsx]

## Sheet: Sheet1
Sample ID	Patient ID	Swab	Solution	Time	Storage	tot DNA (ng)	Number of Reads	chao1	simpson	shannon
1175	MEB24	Cotton	PBS	60s	RT	4.9	265332	351	0.548719	2.28107
2473	MEB03	Cotton	PBS	30s	RT	5.3	257480	320	0.874523	3.86129
2474	MEB03	Cotton	PBS	60s	RT	9.15	275047	321	0.863774	3.67479
2480	MEB02	Cotton	PBS	60s	RT	9.15	Failed	0	0	0
2483	MEB01	Cotton	Saline	60s	RT	4.6	80757	270	0.849119	4.09258
2484	MEB01	Cotton	PBS	30s	-80	7.35	305894	483	0.751541	3.84498
2486	MEB05	Cotton	Saline	30s	RT	9.15	333623	254	0.422647	1.62753
2487	MEB05	Cotton	Saline	60s	RT	10.95	358057	321	0.398333	1.50433
2489	MEB12	Cotton	Saline	30s	RT	7	168490	445	0.948416	5.49837
2490	MEB12	Cotton	Saline	60s	-80	4.55	322627	460	0.918313	5.05636
2513	MEB06	Cotton	Saline	30s	-80	8.1	341952	504	0.673035	2.87243
2514	MEB06	Cotton	Saline	30s	-80	2.135	336134	489	0.817205	3.65032
2685	MEB19	Cotton	Saline	60s	RT	5.25	296984	412	0.889814	3.99052
2686	MEB19	Cotton	Saline	60s	-80	3.675	457005	397	0.886304	3.87043
2691	MEB24	Cotton	PBS	60s	-80	2.55	170188	283	0.7193	3.44422
2692	MEB24	Cotton	PBS	60s	-80	1.985	114031	203	0.634076	2.69617
2704	MEB20	Cotton	Saline	30s	RT	1.585	371557	287	0.837962	3.43765
2711	MEB22	Cotton	Saline	30s	-80	1.63	419411	554	0.938167	5.12082
2714	MEB23	Cotton	PBS	30s	RT	2.3	193011	373	0.933894	4.9123
2715	MEB23	Cotton	PBS	30s	-80	1.87	272009	225	0.814081	3.01542
2723	MEB26	Cotton	PBS	60s	-80	4.025	219607	436	0.870825	4.37534
2895	MEB17	Cotton	Saline	60s	-80	5.4	290703	409	0.643746	2.97602
2909	MEB18	Cotton	PBS	30s	RT	2.465	286553	353	0.802944	3.50336
2910	MEB18	Cotton	PBS	30s	-80	5.45	322586	488	0.897699	4.44792
2475	MEB03	eswab	PBS	30s	RT	23.8	Failed	0	0	0
2481	MEB02	eswab	PBS	30s	-80	25.75	90498	359	0.904688	4.64609
2482	MEB02	eswab	PBS	60s	-80	20.3	178902	517	0.911543	5.03654
2485	MEB01	eswab	PBS	30s	RT	21.5	196313	448	0.599807	2.91189
2488	MEB05	eswab	Saline	30s	RT	28	333424	258	0.402938	1.51796
2491	MEB12	eswab	Saline	30s	-80	22.75	Failed	0	0	0
2515	MEB06	eswab	PBS	60s	-80	26	264549	372	0.453422	2.11116
2687	MEB19	eswab	Saline	30s	RT	27.5	247766	298	0.850476	3.57742
2705	MEB20	eswab	Saline	60s	RT	23.45	307502	283	0.797283	3.21903
2706	MEB20	eswab	Saline	60s	-80	20.45	216600	291	0.775865	3.29462
2712	MEB22	eswab	Saline	60s	-80	15.35	385687	413	0.872238	4.02904
2713	MEB22	eswab	PBS	60s	RT	12.8	230665	426	0.824446	3.61185
2716	MEB23	eswab	Saline	30s	-80	30.25	325878	256	0.809523	2.98097
2717	MEB21	eswab	Saline	60s	RT	22.85	116282	266	0.806713	3.58312
2718	MEB21	eswab	PBS	30s	RT	26.75	37506	161	0.863547	3.87358
2719	MEB21	eswab	PBS	30s	-80	18	193986	349	0.89038	4.38386
2720	MEB25	eswab	Saline	30s	RT	21.85	196783	356	0.666236	3.01794
2721	MEB25	eswab	Saline	60s	RT	23.3	Failed	0	0	0
2722	MEB25	eswab	PBS	30s	-80	15.25	173669	381	0.652102	2.92309
2724	MEB26	eswab	Saline	30s	-80	20.1	411582	541	0.894116	4.69152
2725	MEB26	eswab	PBS	60s	RT	24.05	268627	542	0.90825	4.90254
2896	MEB17	eswab	Saline	60s	-80	22.25	284384	429	0.69525	3.13301
2897	MEB17	eswab	PBS	60s	-80	22.05	267133	565	0.624724	2.94527
2911	MEB18	eswab	PBS	60s	RT	25.25	301229	412	0.907385	4.57823
